# Supplementary material for: Population Genetic Analysis of Propionibacterium acnes Identifies a Subpopulation and Epidemic Clones Associated with Acne
Source: PubMed Central journal article supplement (PMC2924382; doi:10.1371/journal.pone.0012277), 2010-08-19
Supplement: pone.0012277.s002.pdf [file pone.0012277.s002.pdf]

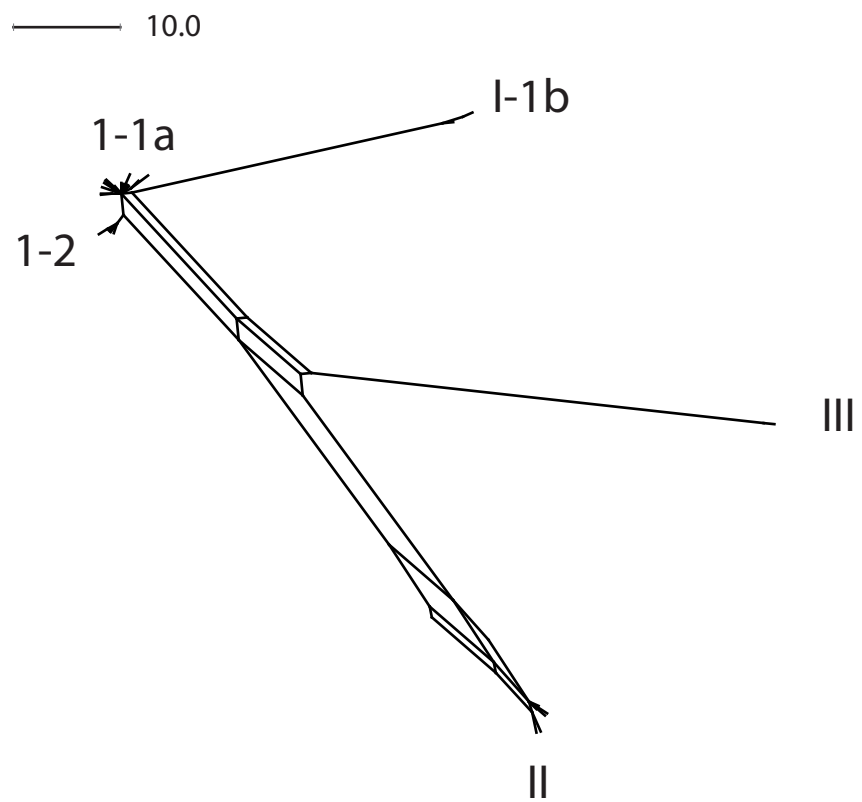

Figure S2. Evidence of limited recombination in the *P. acnes* population. Parsimonious Splits tree based on concatenated sequences of 9 housekeeping gene loci performed with the SplitsTree4 software. The tree shows evidence of recombination playing a role in shaping the genomes of clusters Ib, II, and III.
